# Supplementary material
Source: publisher figshare collection journal article supplement (https://acs.figshare.com/ndownloader/files/6961469)
Supplement: Supplementary file 1 [file 6961469]

# **Computational Study of the Effect of Draft Plates on the Solid Behavior in a Spout-fluid Bed**

**Shiliang Yang<sup>a</sup>, Yuhao Sun<sup>b</sup>, Liangqi Zhang<sup>a</sup>, Jia Wei Chew<sup>a,c,\*</sup>**

<sup>a</sup>School of Chemical and Biomedical Engineering, Nanyang Technological University, Singapore 637459, Singapore

<sup>b</sup>Department of Engineering, University of Cambridge, Cambridge, CB3 0FA, UK

<sup>c</sup>Singapore Membrane Technology Center, Nanyang Environment and Water Research Institute, Nanyang Technological University, Singapore 637141, Singapore

\* Author for correspondence: Jia Wei Chew; Tel: +65 6316 8916; E-mail: [JChew@ntu.edu.sg](mailto:JChew@ntu.edu.sg)

## **Supplementary Information**

1. Repose angle of the granular material
2. Effect of Young's modulus and Poisson ratio
3. Determination of steady-state in the absence and presence of draft plates
4. Comparison of three different drag force models
5. Grid sensitivity
6. Effect of discretization scheme

# 1. Repose angle of the granular material

To determine the repose angle of the granular material adopted in the current work, a packed bed with a total number of 241,525 particles and bed height of 0.217 m is initially formed in a cylindrical geometry (Figure S1a) with a radius of 0.09 m and height of 0.2 m. Specifically, the particles are monodisperse with particle diameters of 3 mm. The material properties are listed in Table 2. When the cylindrical wall is lifted slowly, a particle heap is formed, as shown in Figure S1b. The angle of repose for the current study is ascertained as  $21.3^\circ$ , which agrees with the numerical result of Goniva et al.<sup>27</sup>.

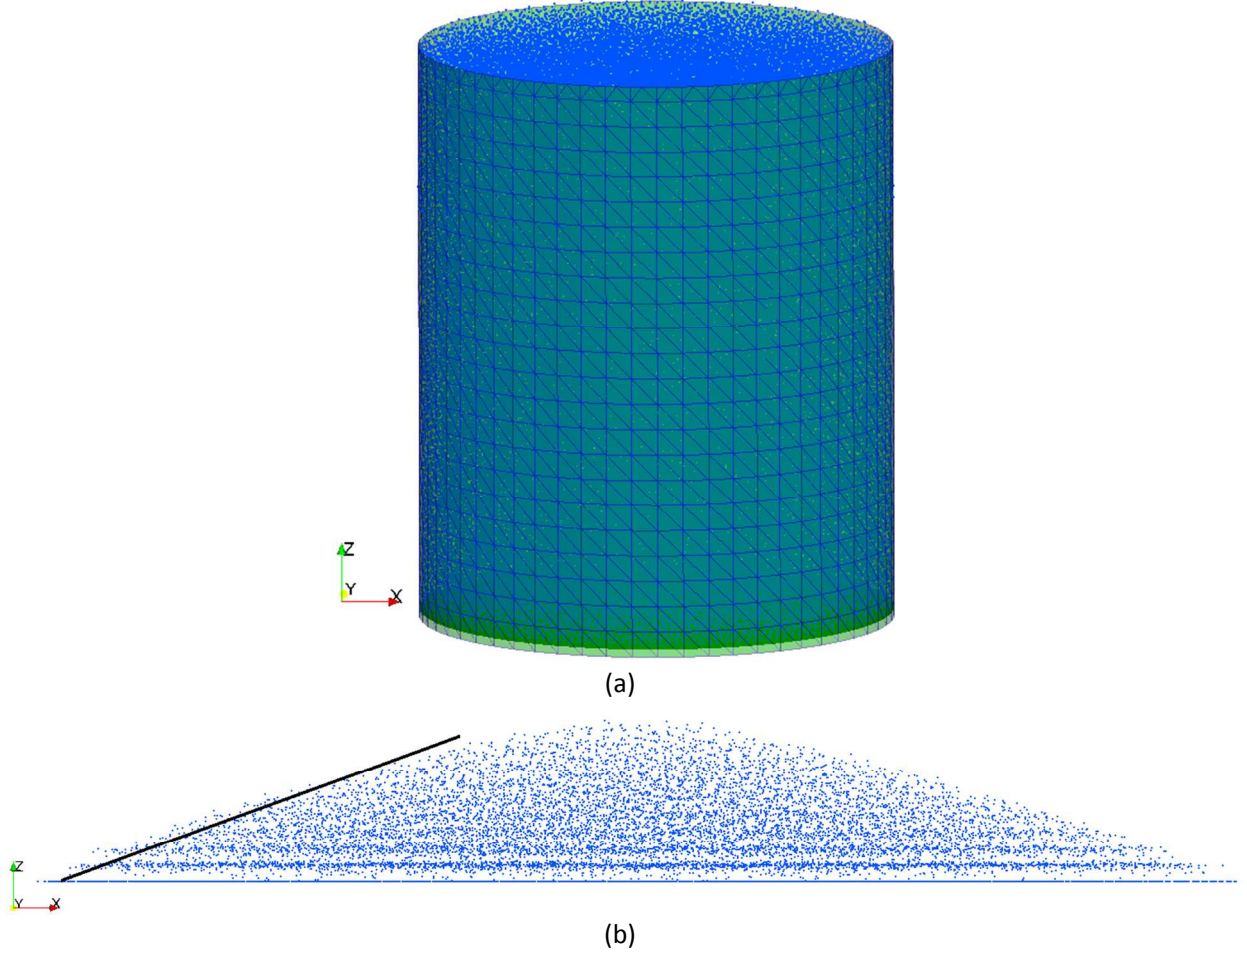

Figure S1. Granular system adopted to evaluate the repose angle of the granular material adopted in the current work: (a) initial configuration of the packed granular system; and (b) the formed heap after the simulation.

## 2. Effect of Young's modulus and Poisson ratio

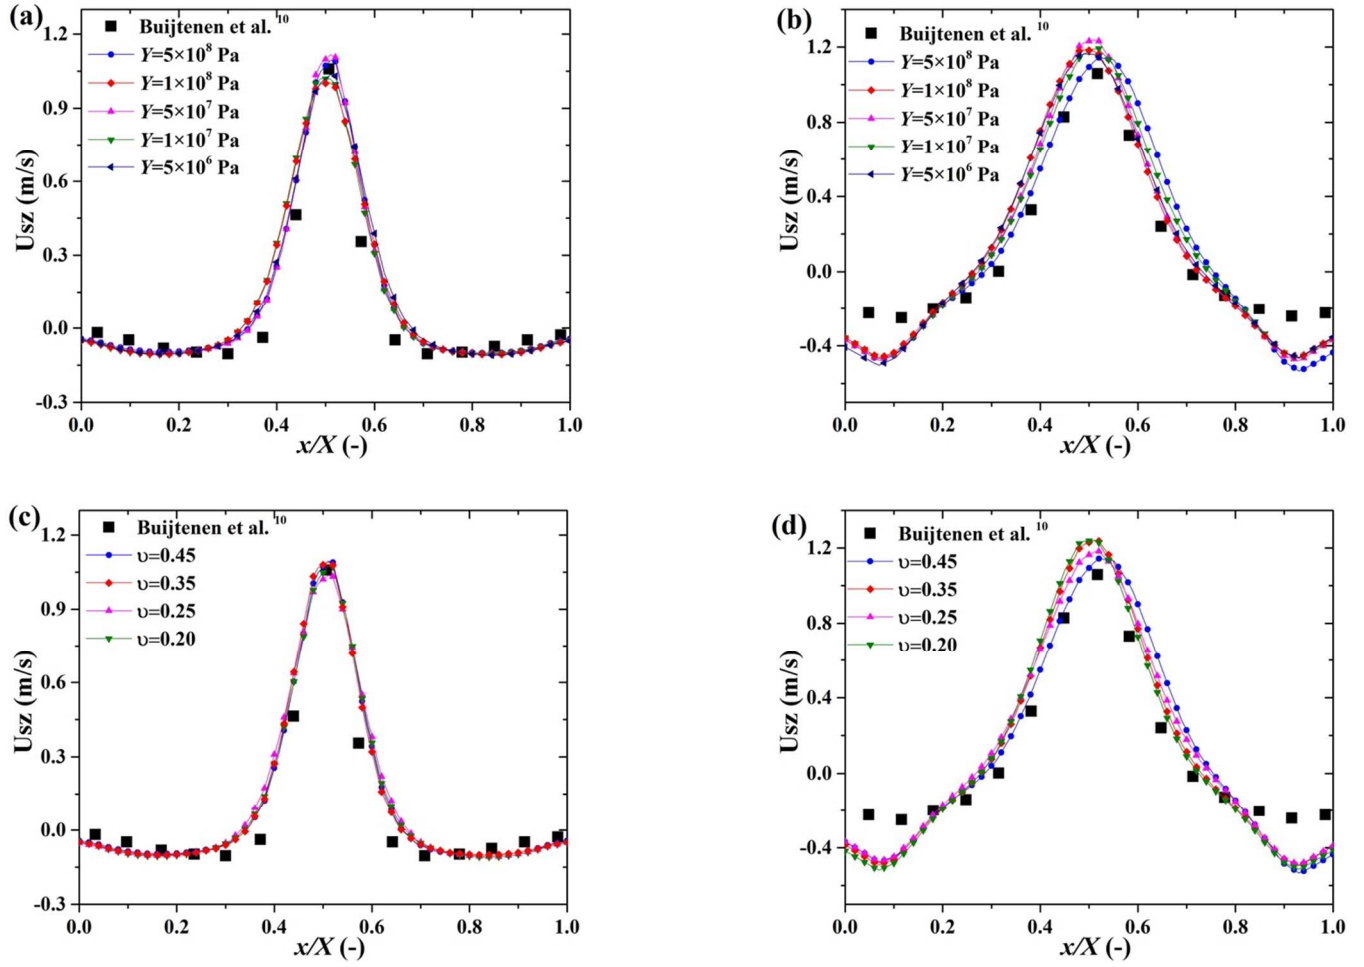

Figure S2. Effect of Young's modulus ((a)  $z/Z = 0.05$  and (b)  $z/Z = 0.1$ ) and Poisson ratio ((c)  $z/Z = 0.05$  and (d)  $z/Z = 0.1$ ) on the time-averaged vertical solid velocity ( $U_{sz}$ ) in the spout-fluid bed without draft plate.

### 3. Determination of steady-state in the absence and presence of draft plates

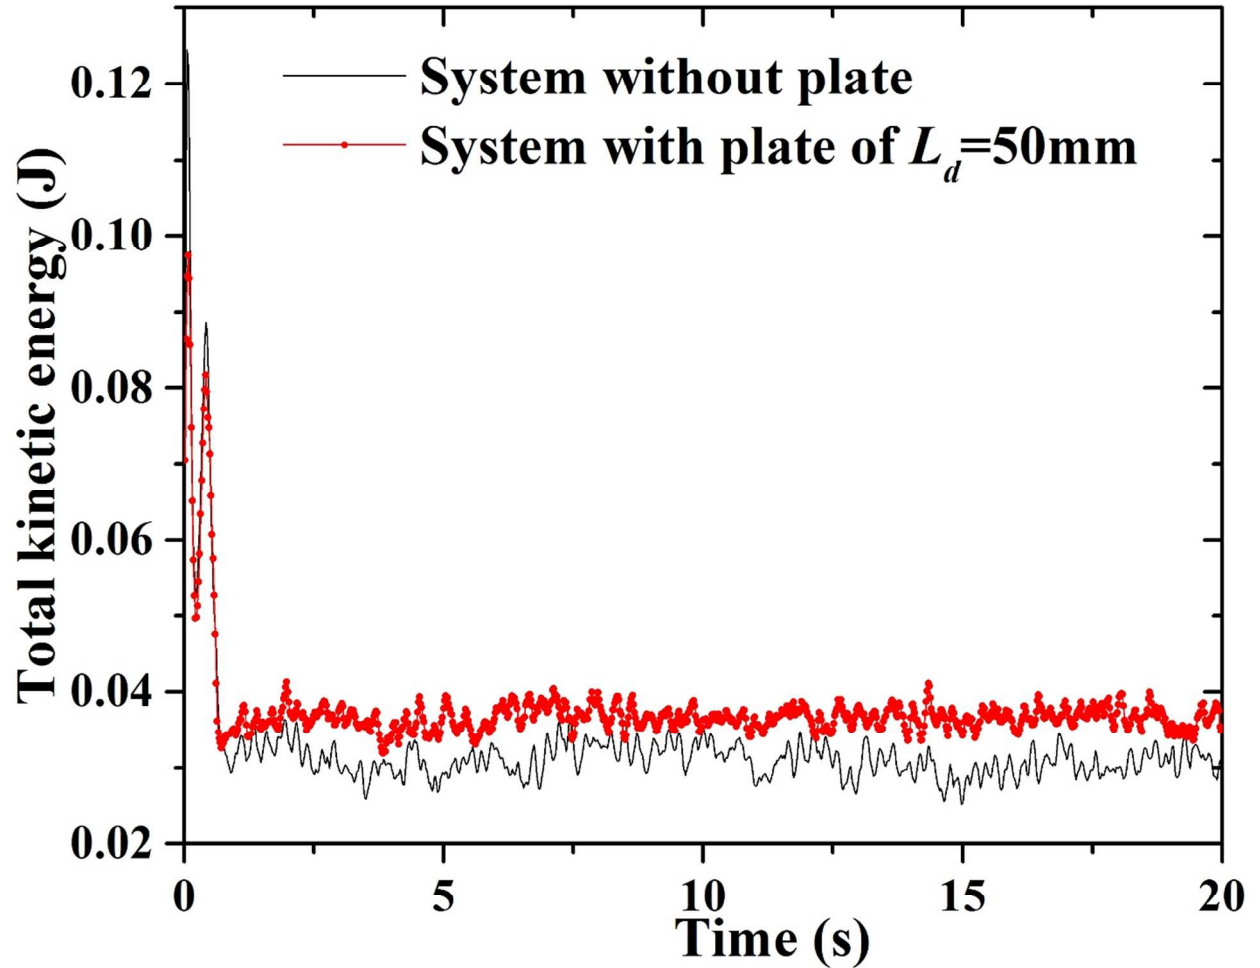

Figure S3. Evolution of the total kinetic energy of the solid phase in the spout-fluid bed in the absence and presence of draft plates ( $L_d = 50\text{ mm}$ ).

### 4. Comparison of three different drag force models

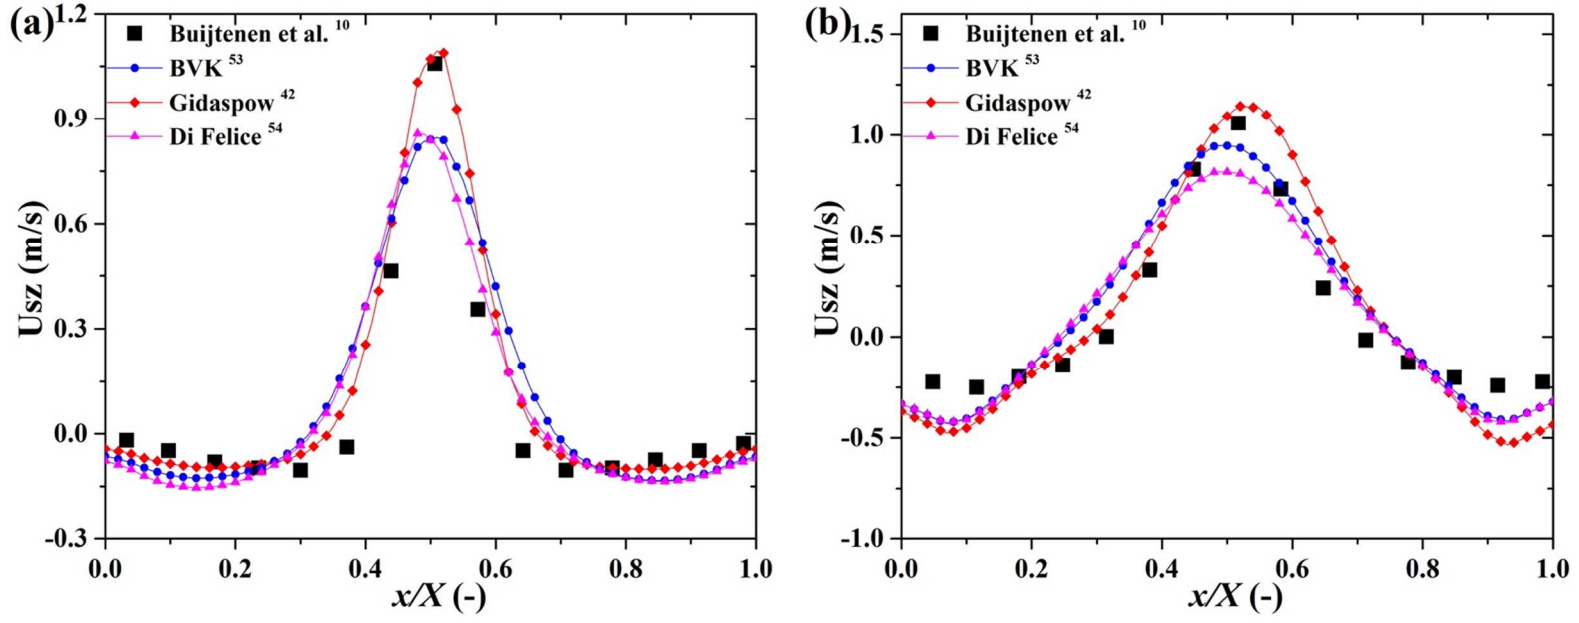

Figure S4. Effect of different drag force models on the time-averaged vertical solid velocity ( $U_{sz}$ ) in the spout-fluid bed without draft plate: (a)  $z/Z = 0.05$ ; and (b)  $z/Z = 0.1$ .

## 5. Grid sensitivity

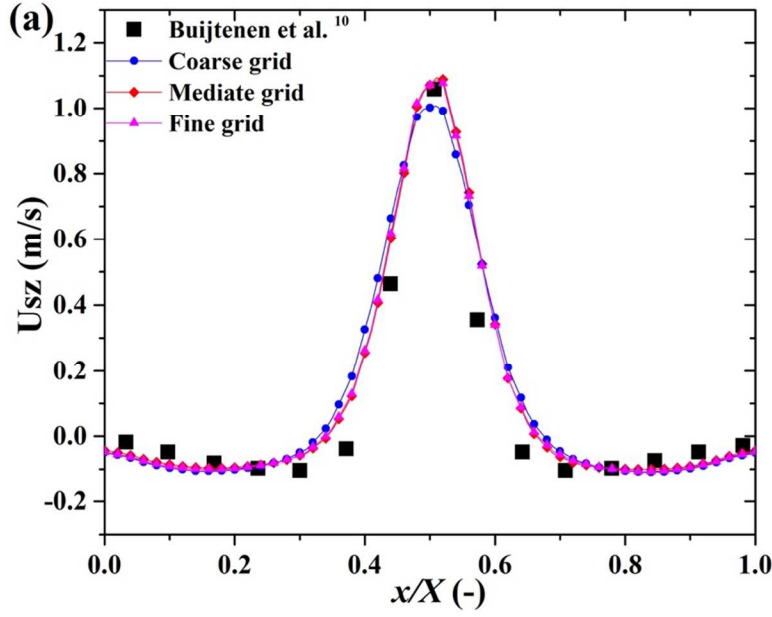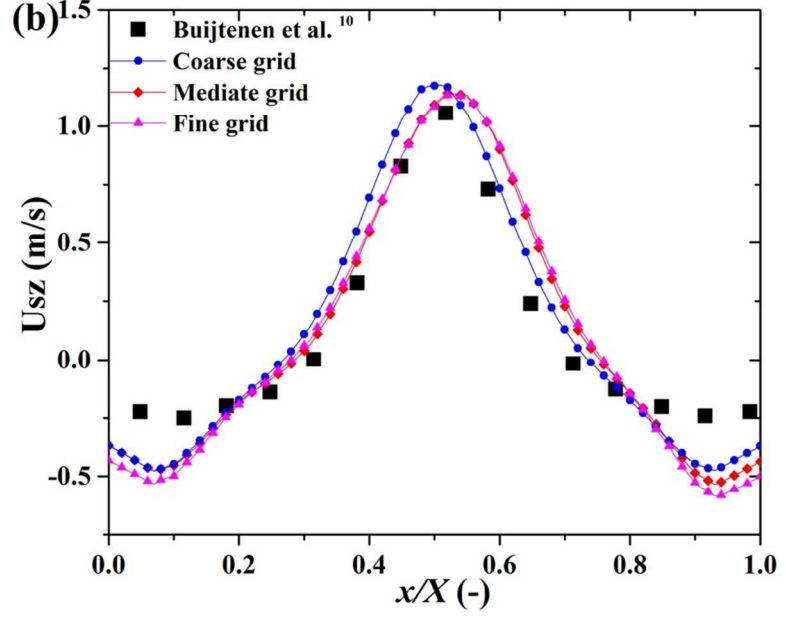

Figure S5. Effect of different grid resolutions (coarse grid:  $15 \times 2 \times 100$  ( $x \times y \times z$ ); medium grid:  $29 \times 4 \times 200$ , fine grid:  $43 \times 6 \times 300$ ) on the time-averaged vertical solid velocity ( $U_{sz}$ ) in the spout-fluid bed without draft plate: (a)  $z/Z = 0.05$ ; and (b)  $z/Z = 0.1$ .

## 6. Effect of discretization scheme

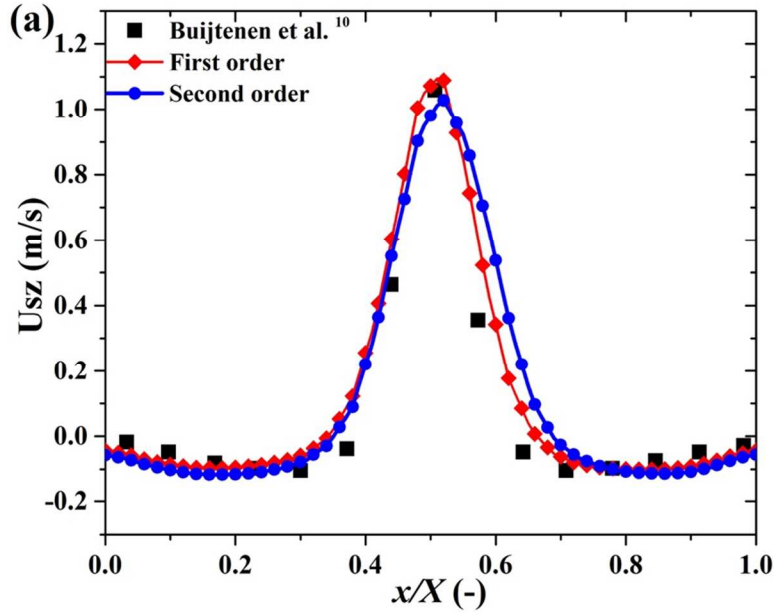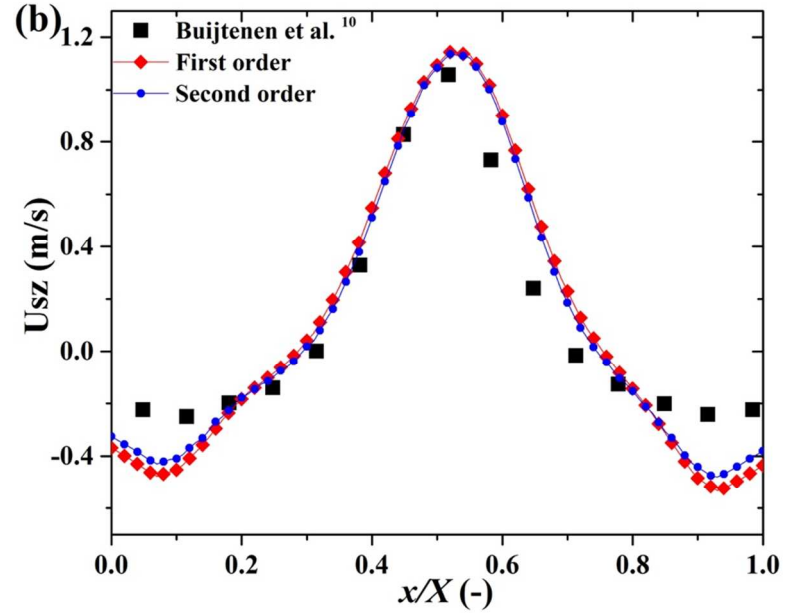

Figure S6. Effect of the discretization scheme adopted for the convective items in the governing equations for the gas phase on the time-averaged vertical solid velocity ( $U_{sz}$ ) in the spout-fluid bed without draft plate: (a)  $z/Z = 0.05$ ; and (b)  $z/Z = 0.1$ .
